## Genome analysis

# TORMES: an automated pipeline for whole bacterial genome analysis

Narciso M. Quijada<sup>1,2</sup>, David Rodríguez-Lázaro<sup>2</sup>, Jose María Eiros<sup>3</sup> and Marta Hernández<sup>1,2,\*</sup>

<sup>1</sup>Laboratory of Molecular Biology and Microbiology, Instituto Tecnológico Agrario de Castilla y León, Valladolid, Spain, <sup>2</sup>Division of Microbiology, Department of Biotechnology and Food Science, Universidad de Burgos, Burgos, Spain and <sup>3</sup>Servicio de Microbiología y Parasitología, Hospital Universitario del Río Hortega, Valladolid, Spain

\*To whom correspondence should be addressed.

Associate Editor: Alfonso Valencia

Received on November 28, 2018; revised on February 12, 2019; editorial decision on March 20, 2019; accepted on April 4, 2019

## Abstract

**Motivation:** The progress of High Throughput Sequencing (HTS) technologies and the reduction in the sequencing costs are such that Whole Genome Sequencing (WGS) could replace many traditional laboratory assays and procedures. Exploiting the volume of data produced by HTS platforms requires substantial computing skills and this is the main bottleneck in the implementation of WGS as a routine laboratory technique. The way in which the vast amount of results are presented to researchers and clinicians with no specialist knowledge of genome sequencing is also a significant issue.

**Results:** Here we present TORMES, a user-friendly pipeline for WGS analysis of bacteria from any origin generated by HTS on Illumina platforms. TORMES is designed for non-bioinformatician users, and automates the steps required for WGS analysis directly from the raw sequence data: sequence quality filtering, de novo assembly, draft genome ordering against a reference, genome annotation, multi-locus sequence typing (MLST), searching for antibiotic resistance and virulence genes, and pangenome comparisons. Once the analysis is finished, TORMES generates an interactive web-like report that can be opened in any web browser and shared and revised by researchers in a simple manner. TORMES can be run by using very simple commands and represent a quick and easy way to perform WGS analysis.

**Availability and implementation:** TORMES is free available at <https://github.com/nmqijada/tormes>.

**Contact:** [hernandez.marta@gmail.com](mailto:hernandez.marta@gmail.com)

**Supplementary information:** [Supplementary data](#) are available at *Bioinformatics* online.

## 1 Introduction

The development of High-Throughput DNA Sequencing (HTS) technologies and the fall in the cost of sequencing have irreversibly changed how bacteria are investigated (Carricho *et al.*, 2018). High-throughput bacterial genome sequencing (also called ‘whole genome sequencing’, WGS) is one of the most popular HTS applications and may replace various traditional molecular and laboratory tests (Taboada *et al.*, 2017). The ability to generate bacterial draft genome sequences routinely has diverse applications, including the

analysis of clinical and laboratory strains and mutants, pathogen surveillance, outbreak detection and investigations of antibiotic resistance (ABR) (Harris *et al.*, 2013; Holt *et al.*, 2012; Howden *et al.*, 2011; Taboada *et al.*, 2017).

The most recent bench-top HTS platforms allow bacterial draft genome sequences to be obtained in the laboratory within a few hours or days (Deurenber *et al.*, 2017). Illumina’s HTS platform has become one of the most popular: they generate millions of reads ~100 to ~300 bp long with low error rates (<1%) such that

bacterial draft genomes can be acquired with high accuracy and coverage (Deng et al., 2016; Goodwin et al., 2016).

WGS is faster and cheaper than traditional methods (such as pulsed-field gel electrophoresis, Sanger sequencing of housekeeping genes for MLST or phenotypic testing) and offers more information: the entire genomic content of the target bacterium (Köser et al., 2014; Ronholm et al., 2016; Taboada et al., 2017). This approach is used by several organizations, and in particular the Food and Drug Administration (FDA) and Center for Disease Control and Prevention (CDC), but its application as a routine laboratory practice is still limited (Carrico et al., 2018; Rantsiou et al., 2018). Although the hardware required for WGS is now affordable, the analysis of the huge amount of data produced by HTS platforms requires advanced computational skills not available to every microbiology laboratory; this is one of the main impediments to the application of WGS (Logares et al., 2012; Sekse et al., 2017). Diverse specialized software for WGS analysis are being developed and adapted in this technological environment, and indeed bacterial bioinformatics is a constantly developing field and a challenge for researchers without a bioinformatics background (Carrico et al., 2018). The routine application of WGS requires cheap, user-friendly techniques that can be used on-site by personnel not specialized in big data management (Hyeon et al., 2018).

Here we present TORMES, an open-source, user-friendly, command-line pipeline for conducting WGS analysis of HTS data produced by Illumina platforms from a set of bacteria. TORMES was designed for non-bioinformatician scientists: automates the steps of the bioinformatic analysis, including sequence quality filtering, *de novo* assembly, draft genome ordering against a reference, genome annotation, MLST, searches for antibiotic resistance and virulence genes and pangenome comparisons. This can be done directly from the raw sequencing data without the need for an internet connection, by following very simple instructions.

Condensing large amounts of data in a format that can be understood by researchers and clinicians with no specialist knowledge of genome sequencing has been identified as a major issue for bacterial genomics (Köser et al., 2012). TORMES stores every file generated during the process and once the analysis is done, the results are summarized in an interactive web-like report that can be revised, shared and compared in an ergonomic manner.

The report is generated in R environment by using an automatically generated RMarkdown code file, unique for each analysis. It is also kept in a separate folder to allow more specialist users to deepen the analysis and modify the code for user-specific reports.

TORMES can be used with an unlimited number of samples and was tested on hundreds of bacterial genomes in isolates of numerous species (including *Escherichia*, *Salmonella*, *Clostridium* and *Klebsiella* spp.) from different origins (clinical, fecal, animal and food-related and environmental) sequenced on Illumina platforms (as an approximation, TORMES analysis with default options of 100 ~3.5 Mbp length genomes with ~50× sequencing depth lasted 16 h on a 124 GB RAM 32 cores computer).

## 2 Materials and methods

### 2.1 Overview of TORMES pipeline

TORMES (named after the river that flows through the city of Salamanca, Spain, in honor of the eight hundredth anniversary of the city's University) is a pipeline for bacterial WGS analysis directly from raw paired-end sequences obtained from Illumina HTS platforms. The TORMES pipeline includes several steps conducted by

different software and that are stored in separate directories for further user usage (summarized in Fig. 1). First, possible remaining sequencing adaptors are removed from raw sequencing reads by using Trimmomatic (Bolger et al., 2014) that are further quality filtered by using Prinseq (Schmieder and Edwards, 2011), Sickle (Joshi and Fass, 2011) or Trimmomatic. The choice of the software to perform the quality filtering, the minimum mean quality score or the minimum length of the raw reads to overcome the filtering can be made by using the `--filtering`, `-q/--quality` and `--min_len` options. Kraken (Wood and Salzberg, 2014) is used to classify the reads taxonomically as an additional quality control. The reads that pass the quality controls are then assembled *de novo* into a draft genome. Genome assembly can be carried out with SPAdes (Bankevich et al., 2012) or Megahit (Li et al., 2015) by using the `--assembler` option. TORMES is designed to work with any bacterial genome; the *de novo* assembly approach is the method of choice for any new bacterium or new strain of a well-known bacterium (Loman et al., 2012). The quality of the assemblies is evaluated by QUAST (Gurevich et al., 2013) and contigs below 200 bp long are discarded. If a closely related genome is available, the contigs in the draft genome can be ordered against it with the option `-r/--reference` using progressiveMauve (Darling et al., 2010). Draft genomes (ordered or not) are then annotated using Prokka (Seemann, 2014). Prokka generates several text-format files per genome annotated that TORMES stores in separate directories for each sample (all included in the main 'annotation' directory, see below). Functional assignment of the predicted genes relies in the information stored in the annotation databases. Standard Prokka installation comes with small test databases that may be insufficient for genome analysis. Users are encouraged to increase and customize the annotation databases by following the instructions stated at the Prokka repository (<https://github.com/tseemann/prokka>). The 'gff' files generated with Prokka are used for a pangenome comparison between the samples using Roary and based on the presence/absence of predicted genes (Page et al., 2015). Pangenome distance trees and summary figures are generated by FastTree (Price et al., 2009) and roary2svg (T. Seemann, <https://github.com/sanger-pathogens/Roary/blob/master/contrib/roary2svg/roary2svg.pl>), respectively. Pangenome analysis can be skipped by using the `--no_pangenome` option. MLST is performed with the mlst software (T. Seemann, <https://github.com/tseemann/mlst>) and the PubMLST database (Jolley and Maiden, 2010), although the analysis can be disabled by using the `--no_mlst` option. The draft genome is screened for antibiotic resistance (ABR) and virulence genes using BLASTn (Zhang et al., 2000) and ABRicate (T. Seemann, <https://github.com/tseemann/abricate>) against ResFinder (Zankari et al., 2012), CARD (McArthur et al., 2013) and ARG-ANNOT (Gupta et al., 2014) or the Virulence Factors Database (VFDB) (Chen et al., 2004), respectively. Instructions for the development of custom-specific gene databases to be included in the TORMES pipeline can be addressed in TORMES repository. Several steps, notably the pangenome analysis and the genome ordering, are time and memory consuming. If the user is not interested in this data, these analyses can be avoided by enabling the `--fast` option, that also uses MegaHit for genome assembly.

TORMES will work with any set of bacteria from any species and origin. More extensive analyses for *Escherichia* and *Salmonella* can be enabled by using the `-g/--genera` option (followed by 'Escherichia' or 'Salmonella'). This allows identification of plasmid replicons using the PlasmidFinder database (Carattoli et al., 2014), detection of point mutations that can cause ABR using PointFinder (Zankari et al., 2017) and serotyping analysis using SerotypeFinder (Joensen et al., 2015) for *Escherichia* or SISTR (Yoshida et al., 2016)

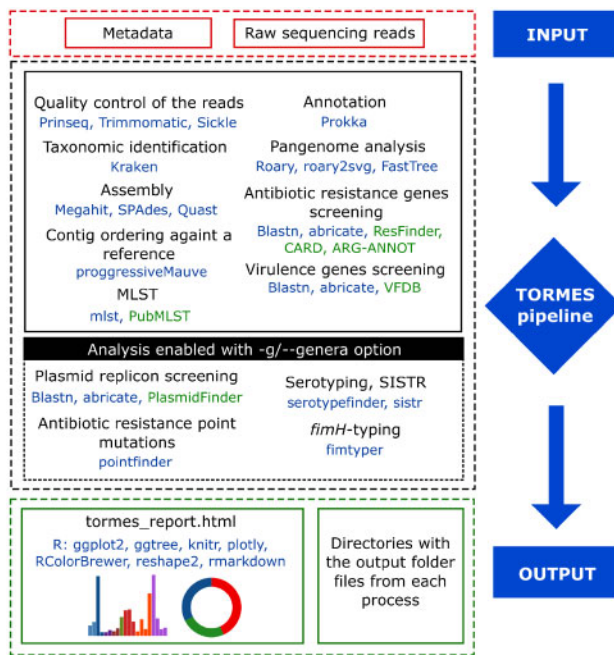

**Fig. 1.** Summary of the TORMES analysis pipeline. Software and R packages appear in blue and databases in green

for *Salmonella*. FimH-typing for *Escherichia* is also possible by using FimTyper (Roer *et al.*, 2017).

All the files generated during the WGS analysis are stored in the directory specified by the option `-o/--output`. The output directory harbors different directories regarding the processes (Fig. 1). The RMarkdown code file (`*tormes_report.Rmd*`), used for the creation of the summary report, is also stored, so users can freely reproduce, modify and generate a user-specific report adjusted to their requirements (instructions can be found in the TORMES repository). The report is generated in R environment (R Development Core Team, 2008) using R packages: `ggplot2` (Wickham, 2009), `ggtree` (Yu *et al.*, 2017), `knitr` (Xie, 2015), `plotly` (Sievert *et al.* 2017), `RColorBrewer` (Neuwirth and Brewer, 2014), `reshape2` (Wickham, 2007) and `rmarkdown` (Allaire, 2015). The web-like report summarizes the results of the TORMES analysis (an example is provided in <https://nmquijada.github.io/tormes/files/>). The file is small (a few MB) allowing easy exchange of information between groups; the report can be opened in any web browser and all tables and figures contained can be copied or downloaded.

The software items listed above are the backbone of TORMES and users are encouraged to cite them (and their version) together with the present article when using TORMES. A summary of the software used by TORMES is included in [Supplementary File 1](#).

## 2.2 Equipment and software setup

TORMES pipeline was built using GNU bash v.4.2.46 (<http://www.gnu.org/software/bash/>), and R v.3.4.3 and can be run on any UNIX system computer. The TORMES pipeline integrates the GNU parallel (Tange, 2011) allowing efficient use of the computer (using the `-t/--threads` option). HTS data require storage space: as an approximation, the TORMES output will double the size of the input data. In the analysis reported here, 1.9 GB of input data (gzipped fastq files) generated a results directory of 3.9 GB.

The TORMES pipeline is freely available in <https://github.com/nmquijada/tormes>, with a manual for its use. TORMES pipeline and

all the required software and dependencies can be automatically installed by using `conda`.

## 2.3 Benefits of open-source project

TORMES software, the instructions for its use and the report generated in the case study can be found in <https://github.com/nmquijada/tormes>. Bacterial bioinformatics is developing rapidly and the availability of open code and tools is crucial for the scientific community to benefit from these developments. New software and tools emerge almost daily and our intention is for the TORMES project to be updated efficiently. The `-g/--genera` option was included to allow TORMES to perform extra analyses of particular bacteria ('*Escherichia*' and '*Salmonella*' options are currently available). TORMES is intended to be a networking project with users providing their feedback and personal experience so that TORMES can become a more complete pipeline including as many analyses and genera as possible.

## 3 Results

### 3.1 Case study: analysis of ten *Salmonella* spp. by using TORMES

TORMES has been tested on hundreds of bacterial genomes from different species and from different sources. As a case study, we report the analysis of ten *Salmonella* spp. that were isolated from food illegally imported into the EU. DNA was extracted and sequenced on an Illumina MiSeq platform (Supplementary File 2) and the raw fastq files were directly submitted to TORMES, with no other bioinformatic treatment, as follows:

```
tormes --metadata salmonella_metadata.txt
--output Salmonella_TORMES_2018 --reference
S_enterica-CT02021853.fasta --threads 32 --genera Salmonella
```

The file parsed to the `--metadata` option included information regarding each isolate (name, location of the reads in the computer and extra metadata). The analysis lasted 1 h in a 124 GB RAM, 32 cores computer and around 3 h in a 16 GB RAM 4 cores laptop. TORMES summarized the results in an interactive web-like file that can be visualized in <https://nmquijada.github.io/tormes/files/>. Raw sequencing data is stored in TORMES repository for the users to download, reproduce and compare the analysis.

Quality control generated 542 482 to 888 038 reads per sample (86% of reads survived overall), that were assembled yielding  $4.67 \pm 0.06$  Mbp-long draft genomes formed by 41 to 188 contigs, with mean N50 of  $128 \pm 78$  kbp and mean sequencing depth of  $37 \pm 5 \times$  (Supplementary File 3). MLST and serotyping revealed that all isolates belonged to subspecies enterica and to six different ST and serovars: three ST279 serovar I 4, [5], 12: d-, two ST4 serovar Montevideo, two ST64 serovar Anatum, one ST11 serovar enteritidis, one ST23 serovar Oranienburg and one ST45 serovar Newport (Supplementary File 3). Pangenome analysis showed 5811 different genes overall, where 3602 of the genes (62% of the total of genes found) were common to all the samples (Supplementary File 4).

The isolates were screened for ABR genes (Fig. 2) with ResFinder, CARD and ARG-ANNOT databases. Isolates MS0498 and MS0499 (both ST279 serovar Montevideo) harbored *qnrB*, associated with resistance to quinolones. MS0496, MS0498 and MS0499 (all ST279) harbored the aminoglycoside resistance gene *AAC(6)-Iaa*, and all the other isolates harbored *AAC(6)-Iy*. All the isolates harbored the genes related to the multidrug and metal efflux pump complex MdsABC (*golS*, *mdsA*, *mdsB* and *mdsC*). Mutation

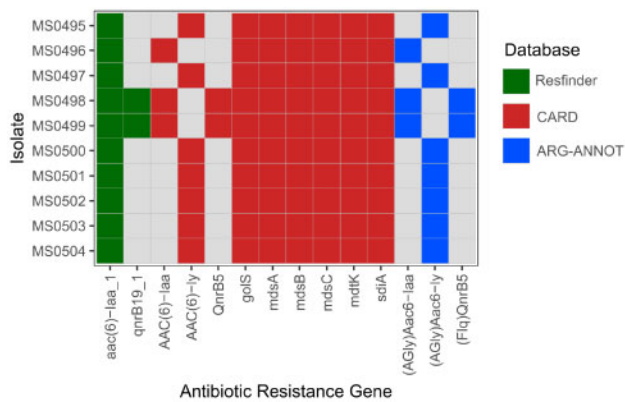

**Fig. 2.** Presence of antibiotic resistance genes in the samples included in the case study determined using different databases: Resfinder (green), CARD (red) and ARG-ANNOT (blue)

T57S in ParC conferring resistance to nalidixic acid and ciprofloxacin was detected in all isolates but MS0500 (ST11). No plasmids nor single nucleotide mutations known for causing resistance in *gyrA*, *gyrB*, *parE*, *pmrA* or *pmrB* were found. Eighty-six to 96 virulence genes from the Virulence Factor Database were found per isolate (Supplementary File 5). Most of the virulence genes, including type-III secretion system genes, were found in all the isolates. MS0500 (ST11) was the only sample carrying *sodCl* and *lpfD* genes, related to the stress response and adherence, respectively. MS0500 (ST11), MS0495 and MS0497 (both ST4) harbored *ratB* which is involved in intestinal colonization and persistence. The cytolethal distending toxin gene *cdtB* was found in MS0495, MS0497 and MS0501 (ST23). The ST64 samples MS0502 and MS0503 harbored *tcpC*, a gene important in immune evasion and that promotes renal tissue damage.

*Salmonella* is an enteric pathogen that causes a range of diseases in humans with high associated morbidity and mortality, (Bularudas et al., 2015; Nuccio and Bäumler, 2014). Multidrug resistant *Salmonella* spp. are a public health concern and its rapid identification and investigation is critical making its quick identification and investigation is widely important (Mourão et al., 2014; Ziech et al., 2016). The study shows the potential of TORMES to perform quick and in-depth WGS analysis directly from raw sequencing data by using simple commands.

## 4 Discussion

HTS has transformed microbiology (De Filippis et al., 2018). Rapid and low-cost genome sequencing is such that WGS may replace many current laboratory tests and methods (Ronholm et al., 2016). Scientists in academia, the regulatory sector and industry increasingly recognize WGS as the method of choice for basic research and epidemiological investigations (Rantsiou et al., 2018). However, the use of WGS as a routine laboratory technique requires overcoming existing challenges and limitations. Bioinformatic analysis is the main bottleneck in WGS studies, and is required due to handle the large amounts of data generated by HTS platforms (Oniciuc et al., 2018). Presenting and sharing the substantial volumes of information with technicians and clinicians with no specialist knowledge of genome sequencing can be problematic (Logares et al., 2012). Standardized and user-friendly software and pipelines make WGS analysis more accessible, even to those without bioinformatic training (De Filippis et al., 2018).

We developed TORMES, a bioinformatic pipeline for direct WGS analysis of raw sequencing data from Illumina HTS platforms. TORMES code is open, and with the software and databases versions utilized by the users, provide third parties with all they need to track the progress of the analysis. If the data and the underlying code used for the analysis are not made available, the ability of others to reproduce and build upon the analysis will obviously be limited (Schloss, 2018). ‘Best practice’ recommendations for making of research software robust consider the availability of code essential for experiment reproducibility and replicability (Taschuk and Wilson, 2017).

Several web tools, such as RAST (Aziz et al., 2008), PATRIC (Wattam et al., 2014) and MicroScope (Vallet et al., 2013) have been developed in the last years, and integrate user-friendly interfaces that represent very powerful tools for the analysis and comparison of WGS data. However, analyses are preformatted and do not allow user customization and they require the data to be uploaded into their servers. TORMES is designed to run in your own computer without the need of internet connection, access accounts or extra requirements. TORMES integrates Prokka, which is the gold command-line application for bacterial genome annotation. Prokka starts from an assembled genome and it allows annotation databases customization that may lead to the inclusion of rare taxa that usually lacks on external databases (Rachid et al., 2013). TORMES expands the spectrum of Prokka as it starts directly from raw sequencing data and include additional analysis, such as contig ordering against a reference, pangenome analysis based on the presence/absence of accessory genes and core genome distances, detection of point mutations and subtyping analysis (such as MLST, serotyping and *fimH*-typing). TORMES can be run using very simple commands and be the method of choice for researches lacking strong bioinformatic background to perform WGS analysis of a set of bacteria.

Advanced genomics and bioinformatics systems have proven their worth in reducing response times to emerging disease outbreaks. They provide substantial socioeconomic benefits in terms of improved public health, reduced health care costs and avoidance of loss of productivity due to illness (Scharff et al., 2016). *In silico* serotype prediction methods, such as SISTR (Yoshida et al., 2016) and SerotypeFinder (Joensen et al., 2015), both implemented in TORMES for *S. enterica* and *E. coli*, respectively, are substantially cheaper and easier than conventional antibody-based serotype determinations (Taboada et al., 2017). In addition, TORMES allows the quick detection of antibiotic resistance (including point mutations in *S. enterica* and *E. coli*) and virulence genes, through exploiting curated and regularly updated databases, such as ResFinder, CARD, ARG-ANNOT and VFDB. Strengthening ABR surveillance worldwide is critical, and required for informing global strategies, monitoring the effectiveness of public health interventions and detecting new trends and emerging threats (Oniciuc et al., 2018). Finally, TORMES facilitates the interpretation and exchange of information, as results are automatically summarized in an interactive web-like report.

## 5 Conclusion

The implementation of WGS has enormous potential for bacterial research and its development is critically linked to the public availability of both genomic data and analysis tools. Regularly updated open-source and user-friendly pipelines and software, such as TORMES, may help to unleash the potential of bacterial bioinformatics and make WGS a feasible tool for the research community.

## Acknowledgements

NMQ received a PhD fellowship from the Spanish National Institute for Agriculture and Food Research and Technology (INIA, Ministerio de Economía, Industria y Competitividad; fellowship FPI2014-020).

## Funding

This study was co-funded by The Spanish Ministry of Economy, Industry and Competitiveness (MINECO; AGL2016-74882-C3), the Junta de Castilla y León (JCyL; GRS 1780/A/18) and the European Regional Development Fund (ERDF).

*Conflict of Interest:* none declared.

## References

- Allaire, J.J. (2015) *rmarkdown: Dynamic Documents for R*. <http://rmarkdown.rstudio.com/>.
- Aziz, R.K. *et al.* (2008) The RAST Server: rapid annotations using subsystems technology. *BMC Genomics*, **9**, 75.
- Bankevich, A. *et al.* (2012) SPAdes: a new genome assembly algorithm and its applications to single-cell sequencing. *J. Comput. Biol.*, **19**, 455–477.
- Bolger, A.M. *et al.* (2014) Trimmomatic: a flexible trimmer for Illumina sequence data. *Bioinformatics*, **30**, 2114–2120.
- Bula-Rudas, F.J. *et al.* (2015) Salmonella infections in childhood. *Adv. Pediatr.*, **62**, 29–58.
- Carattoli, A. *et al.* (2014) In silico detection and typing of plasmids using PlasmidFinder and plasmid multilocus sequence typing. *Antimicrob. Agents Chemother.*, **58**, 3895–3903.
- Carricho, J.A. *et al.* (2018) A primer on microbial bioinformatics for nonbioinformaticians. *Clin. Microbiol. Infect.*, **24**, 342–349.
- Chen, L. *et al.* (2004) VFDB: a reference database for bacterial virulence factors. *Nucleic Acids Res.*, **33**, D325–D328.
- Darling, A.E. *et al.* (2010) progressiveMauve: multiple genome alignment with gene gain, loss and rearrangement. *PLoS One*, **5**, e11147.
- De Filippis, F. *et al.* (2018) Recent past, present, and future of the food microbiome. *Annu. Rev. Food Sci. Technol.*, **9**, 589–608.
- Deng, X. *et al.* (2016) Genomic epidemiology: whole-genome-sequencing-powered surveillance and outbreak investigation of foodborne bacterial pathogens. *Ann. Rev. Food. Sci. Technol.*, **7**, 353–374.
- Deurenber, R.H. *et al.* (2017) Application of next generation sequencing in clinical microbiology and infection prevention. *J. Biotechnol.*, **243**, 16–24.
- Goodwin, S. *et al.* (2016) Coming of age: ten years of next-generation sequencing technologies. *Nat. Rev. Genet.*, **17**, 333–351.
- Gupta, S.K. *et al.* (2014) ARG-ANNOT, a new bioinformatic tool to discover antibiotic resistance genes in bacterial genomes. *Antimicrob. Agents Chemother.*, **58**, 212–220.
- Gurevich, A. *et al.* (2013) QUAST: quality assessment tool for genome assemblies. *Bioinformatics*, **29**, 1072–1075.
- Harris, S.R. *et al.* (2013) Whole-genome sequencing for analysis of an outbreak of methicillin-resistant *Staphylococcus aureus*: a descriptive study. *Lancet Infect. Dis.*, **13**, 130–136.
- Hernández, M. *et al.* (2017) Co-occurrence of colistin-resistance genes *mcr-1* and *mcr-3* among multidrug-resistant *Escherichia coli* isolated from cattle. Spain, September 2015. *Euro Surveill.*, **22**, 30586.
- Holt, K. *et al.* (2012) *Shigella sonnei* genome sequencing and phylogenetic analysis indicate recent global dissemination from Europe. *Nat. Genet.*, **44**, 1056–1059.
- Howden, B.P. *et al.* (2011) Evolution of multidrug resistance during *Staphylococcus aureus* infection involves mutation of the essential two component regulator WalKR. *PLoS Pathog.*, **7**, e1002359.
- Hyeon, J.Y. *et al.* (2018) Quasi-metagenomics and realtime sequencing aided detection and subtyping of *Salmonella enterica* from food samples. *Appl. Environ. Microbiol.*, **84**, e02340–e02317.
- Joensen, K.G. *et al.* (2015) Rapid and easy in silico serotyping of *Escherichia coli* isolates by use of whole-genome sequencing data. *J. Clin. Microbiol.*, **53**, 2410–2426.
- Jolley, K.A. and Maiden, M.C.J. (2010) BIGSdb: scalable analysis of bacterial genome variation at the population level. *BMC Bioinformatics*, **11**, 595.
- Joshi, N.A. and Fass, J.N. (2011) Sickle: a sliding-window, adaptive, quality-based trimming tool for FastQ files (Version 1.33) [Software]. Available at <https://github.com/najoshi/sickle>.
- Köser, C.U. *et al.* (2014) Whole-genome sequencing to control antimicrobial resistance. *Trends Genet.*, **30**, 401–407.
- Köser, C.U. *et al.* (2012) Routine use of microbial whole genome sequencing in diagnostic and public health microbiology. *PLoS Pathog.*, **8**, e1002824.
- Li, D. *et al.* (2015) MEGAHIT: an ultra-fast single-node solution for large and complex metagenomics assembly via succinct de Bruijn graph. *Bioinformatics*, **31**, 1674–1676.
- Logares, R. *et al.* (2012) Environmental microbiology through the lens of high-throughput DNA sequencing: synopsis of current platforms and bioinformatics approaches. *J. Microbiol. Methods*, **91**, 106–113.
- Loman, N.J. *et al.* (2012) High-throughput bacterial genome sequencing: an embarrassment of choice, a world of opportunity. *Nat. Rev. Microbiol.*, **10**, 599–606.
- McArthur, A.G. *et al.* (2013) The comprehensive antibiotic resistance database. *Antimicrob. Agents Chemother.*, **57**, 3348–3357.
- Mourão, J. *et al.* (2014) Characterization of the emerging clinically-relevant multidrug-resistant *Salmonella enterica* serotype 4, [5], 12:i:– (monophasic variant of *S. typhimurium*) clones. *Eur. J. Clin. Microbiol. Infect. Dis.*, **33**, 2249–2257.
- Neuwirth, E. and Brewer, R.C. (2014) ColorBrewer palettes. <https://CRAN.R-project.org/package=RColorBrewer>.
- Nuccio, S.P. and Bäuml, A.J. (2014) Comparative analysis of Salmonella genomes identifies a metabolic network for escalating growth in the inflamed gut. *MBio*, **5**, e00929–14.
- Oniciuc, E.A. *et al.* (2018) The present and future of whole genome sequencing (WGS) and whole metagenome sequencing (WMS) for surveillance of antimicrobial resistant microorganisms and antimicrobial resistance genes across the food chain. *Genes*, **9**, 268.
- Page, A.J. *et al.* (2015) Roary: rapid large-scale prokaryote pan genome analysis. *Bioinformatics*, **31**, 3691–3693.
- Price, M.N. *et al.* (2009) FastTree: computing large minimum evolution trees with profiles instead of a distance matrix. *Mol. Biol. Evol.*, **26**, 1641–1650.
- R Development Core Team. (2008) *R: A Language and Environment for Statistical Computing*. R Foundation for Statistical Computing, Vienna, Austria.
- Rachid, C.T.C.C. *et al.* (2013) Effect of sugarcane burning or green harvest methods on the Brazilian Cerrado soil bacterial community structure. *PLoS One*, **8**, e59342.
- Rantsiou, K. *et al.* (2018) Next generation microbiological risk assessment: opportunities of whole genome sequencing (WGS) for foodborne pathogen surveillance, source tracking and risk assessment. *Int. J. Food Microbiol.*, **287**, 3–9.
- Rodríguez-Lázaro, D. *et al.* (2015) Identification and molecular characterization of pathogenic bacteria in foods confiscated from non-EU flights passengers at one Spanish airport. *Int. J. Food. Microbiol.*, **209**, 20–25.
- Roer, L. *et al.* (2017) Development of a web tool for *Escherichia coli* subtyping based on fimH alleles. *J. Clin. Microbiol.*, **55**, 2538–2543.
- Ronholm, J. *et al.* (2016) Navigating microbiological food safety in the era of whole-genome sequencing. **29**, 837–857.
- Scharff, R.L. *et al.* (2016) An economic evaluation of PulseNet: a network for foodborne disease surveillance. *Am. J. Prev. Med.*, **50**, S66–S73.
- Schloss, P.D. (2018) Identifying and overcoming threats to reproducibility, replicability, robustness, and generalizability in microbiome research. *MBio*, **9**, e00525–18.
- Schmieder, R. and Edwards, R. (2011) Quality control and preprocessing of metagenomic datasets. *Bioinformatics*, **27**, 863–864.
- Seemann, T. (2014) Prokka: rapid prokaryotic genome annotation. *Bioinformatics*, **30**, 2068–2069.
- Sekse, C. *et al.* (2017) High throughput sequencing for detection of foodborne pathogens. *Front. Microbiol.*, **8**, 1–26.
- Sievert, C. *et al.* (2017) plotly: Create Interactive Web Graphics via ‘plotly.js’. <https://CRAN.R-project.org/package=plotly>.

- Taboada, E.N. et al. (2017) Food safety in the age of next generation sequencing, bioinformatics, and open data access. *Front. Microbiol.*, **8**, 909.
- Tange, O. (2011) GNU parallel: the command-line power tool. *USENIX Mag.*, **36**, 42–47.
- Taschuk, M. and Wilson, G. (2017) Ten simple rules for making research software more robust. *PLoS Comput. Biol.*, **13**, e1005412.
- Vallenet, D. et al. (2013) MicroScope—an integrated microbial resource for the curation and comparative analysis of genomic and metabolic data. *Nucleic Acids Res.*, **41**, D636–D647.
- Wattam, A.R. et al. (2014) PATRIC, the bacterial bioinformatics database and analysis resource. *Nucleic Acids Res.*, **42**, D581–D591.
- Wickham, H. (2007) Reshaping data with the reshape package. *J. Stat. Softw.*, **21**, 1–20.
- Wickham, H. (2009) *ggplot2: Elegant Graphics for Data Analysis*. Springer, New York.
- Wood, D.E. and Salzberg, S.L. (2014) Kraken: ultrafast metagenomic sequence classification using exact alignments. *Genome Biol.*, **15**, R46.
- Xie, Y. (2015) *Dynamic Documents with R and Knitr*. Chapman and Hall/CRC, Boca Raton, Florida.
- Yoshida, C.E. et al. (2016) The *Salmonella* in silico typing resource (SISTR): an open web-accessible tool for rapidly typing and subtyping draft *Salmonella* genome assemblies. *PLoS One*, **11**, e0147101.
- Yu, G. et al. (2017) ggtree: an R package for visualization and annotation of phylogenetic trees with their covariates and other associated data. *Methods Ecol. Evol.*, **8**, 28–36.
- Zankari, E. et al. (2012) Identification of acquired antimicrobial resistance genes. *J. Antimicrob. Chemother.*, **67**, 2640–2644.
- Zankari, E. et al. (2017) PointFinder: a novel web tool for WGS-based detection of antimicrobial resistance associated with chromosomal point mutations in bacterial pathogens. *J. Antimicrob. Chemother.*, **72**, 2764–2768.
- Zhang, Z. et al. (2000) A greedy algorithm for aligning DNA sequences. *J. Comput. Biol.*, **7**, 203–214.
- Ziech, R.E. et al. (2016) Multidrug resistance and ESBL-producing *Salmonella* spp. isolated from broiler processing plants. *Braz. J. Microbiol.*, **47**, 191–195.
